# Supplementary material for: Electronic structure of Li+@C60 adsorbed on methyl-ammonium lead iodide perovskite CH3NH3PbI3 surfaces
Source: Royal Society of Chemistry journal article supplement (doi:10.1039/d1ma00741f), 2021-10-13
Supplement: d1ma00741f1.pdf [file d1ma00741f1.pdf]

## Supplementary Information

Electronic structure of  $\text{Li}^+\text{@C}_{60}$  adsorbed on methyl-ammonium lead  
iodide perovskite  $\text{CH}_3\text{NH}_3\text{PbI}_3$  surfaces

Khian-Hooi Chew,<sup>1</sup> Riichi Kuwahara,<sup>2</sup> and Kaoru Ohno<sup>3</sup>

<sup>1</sup>*Department of Physics, University of Malaya, 50603 Kuala Lumpur, Malaysia.*

<sup>2</sup>*Dassault Systèmes, ThinkPark Tower, 2-1-1 Osaki, Shinagawa-ku, Tokyo 141-6020, Japan*

<sup>3</sup>*Department of Physics, Yokohama National University, 79-5 Tokiwadai, Hogogaya-ku,*

From Figs. S4-S11 (Table 2), the MAPbI<sub>3</sub>/Li<sup>+</sup>(bottom)@C<sub>60</sub> system with the aboveC geometry is stabilized by two C··H(-C) (in the ranges 2.612Å- 2.660Å), two C··C(-H) (in the ranges 3.538Å – 3.544Å) and one C··I(-Pb) (~3.787 Å) vdWs interactions. On the other hand, there are four vdWs interactions in the MAPbI<sub>3</sub>/Li<sup>+</sup>(top)@C<sub>60</sub> system with the aboveC geometry: two C··H(-C) in the ranges 2.619Å- 2.665Å, one C··C(-H) ~ 3.544 Å and one C··I(-Pb) ~3.787 Å. This could be one of the factors that contributes to the total energy difference of ~0.031 eV (and the binding energy difference of ~0.031 eV) from the most stable structure (the MAPbI<sub>3</sub>/Li<sup>+</sup>(bottom)@C<sub>60</sub> system with the aboveC geometry). It is interesting to see that the MAPbI<sub>3</sub>/Li@C<sub>60</sub> system with the aboveC geometry has more atomic distances within the sum of their vdW radii than the MAPbI<sub>3</sub>/Li<sup>+</sup>@C<sub>60</sub> system. There are six C··I(-Pb) bond distances within the vdWs interactions (in the ranges of 3.411Å - 3.762Å) in both the MAPbI<sub>3</sub>/Li<sup>+</sup>(top)@C<sub>60</sub> and MAPbI<sub>3</sub>/Li<sup>+</sup>(bottom)@C<sub>60</sub> system with the aboveI geometry. For the MAPbI<sub>3</sub>/Li<sup>+</sup>@C<sub>60</sub> system with the bridge geometry, they have six potential vdW interactions: two C··H(-C) in the ranges 2.791Å – 2.990Å, two C··C(-H) in the ranges 3.443Å – 3.465Å and two C··I(-Pb) in the ranges 3.519Å – 3.741Å.

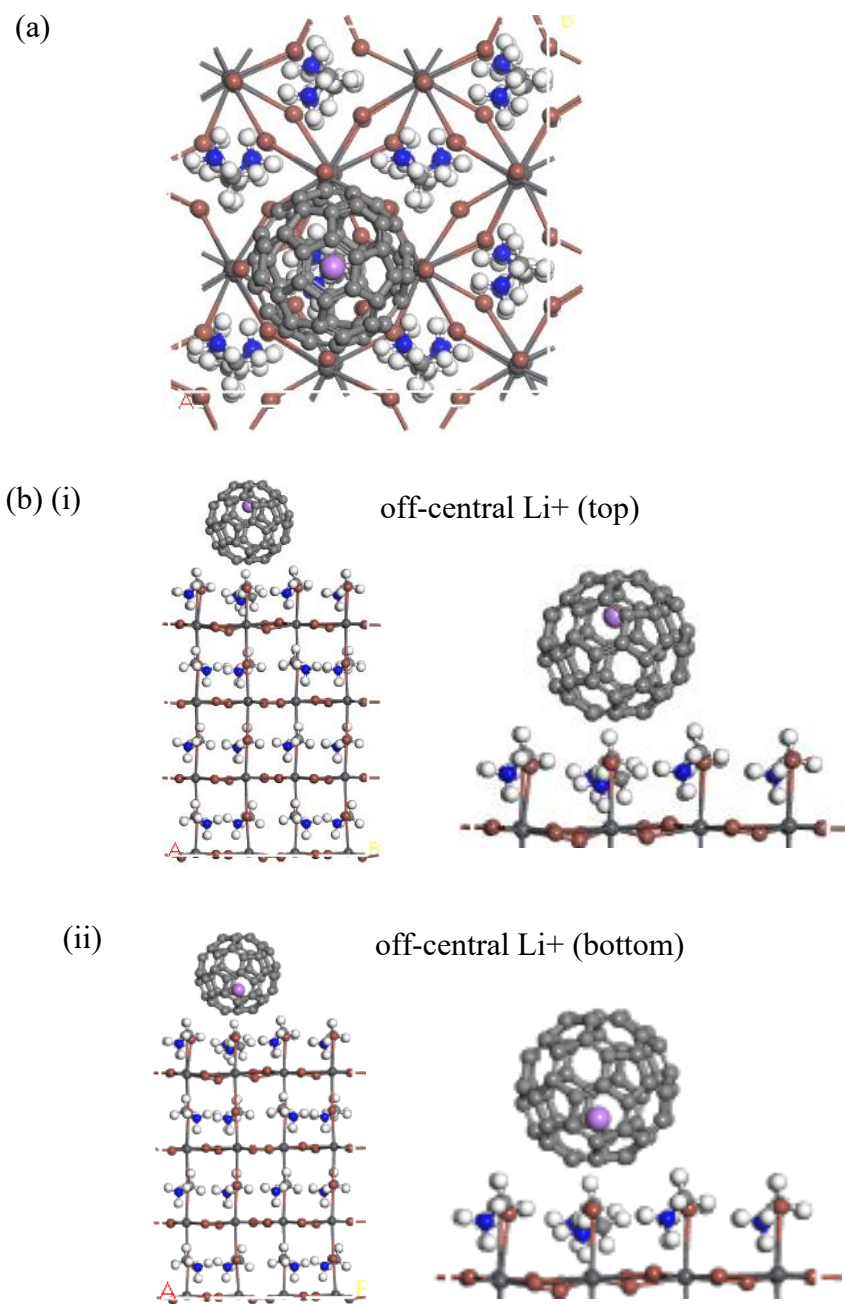

**Figure S1.** Optimized structures of a MAPbI<sub>3</sub>/Li<sup>+</sup>@C<sub>60</sub> heterojunction with tetragonal-phase perovskites: (a) top and (b) side views. The perovskite has a topC orientation with a lithium endohedral fullerene Li<sup>+</sup>@C<sub>60</sub> on the aboveC geometry. (b) Side views represent the Li<sup>+</sup> located at the off-central (i) top and (ii) bottom inside the C<sub>60</sub> cage. H, C, N, I, Pb and Li atoms are represented by the white, light grey, blue, brown, dark grey and purple spheres, respectively.

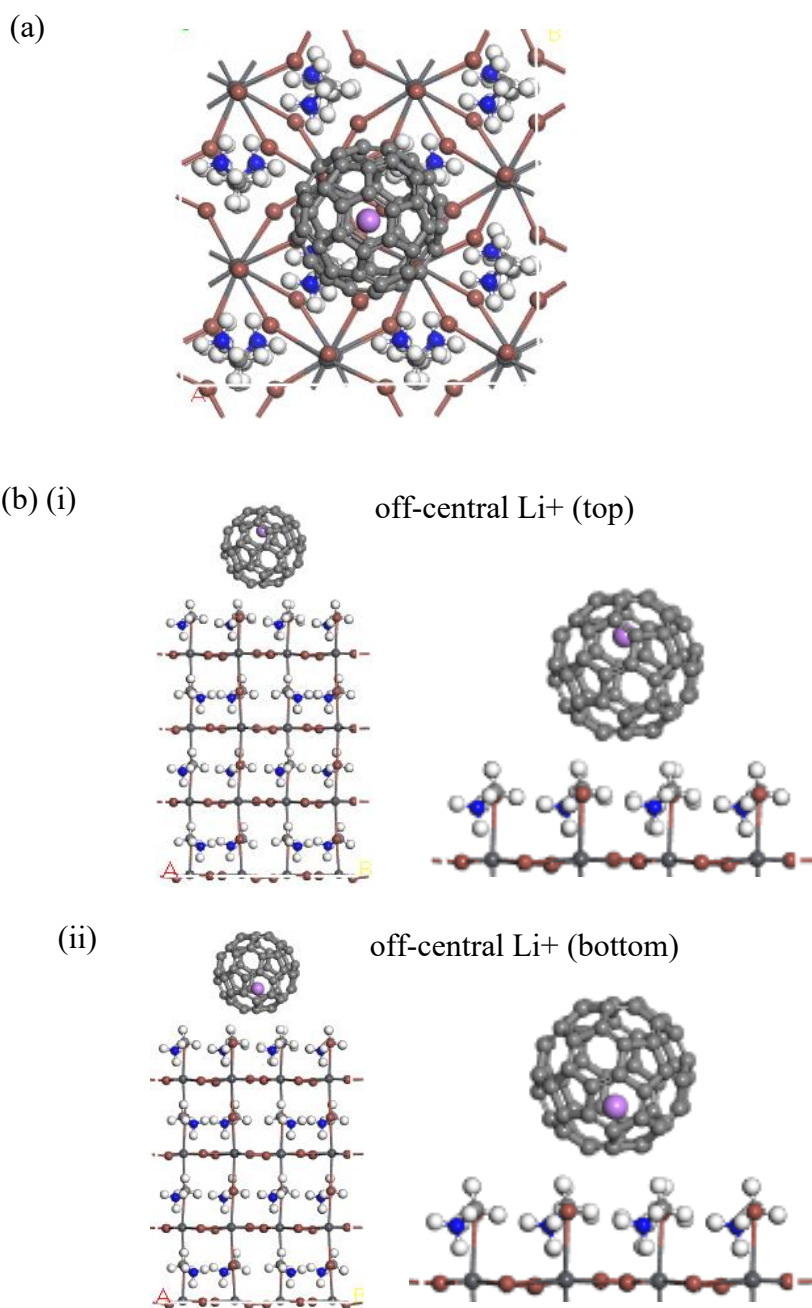

**Figure S2.** Optimized structures of a  $\text{MAPbI}_3/\text{Li}^+\text{@C}_{60}$  heterojunction with tetragonal-phase perovskites: (a) top and (b) side views. The perovskite has a topC orientation with a lithium endohedral fullerene  $\text{Li}^+\text{@C}_{60}$  on the aboveI position. (b) Side views represent the  $\text{Li}^+$  located at the off-central (i) top and (ii) bottom inside the  $\text{C}_{60}$  cage. H, C, N, I, Pb and Li atoms are represented by the white, light grey, blue, brown, dark grey and purple spheres, respectively.

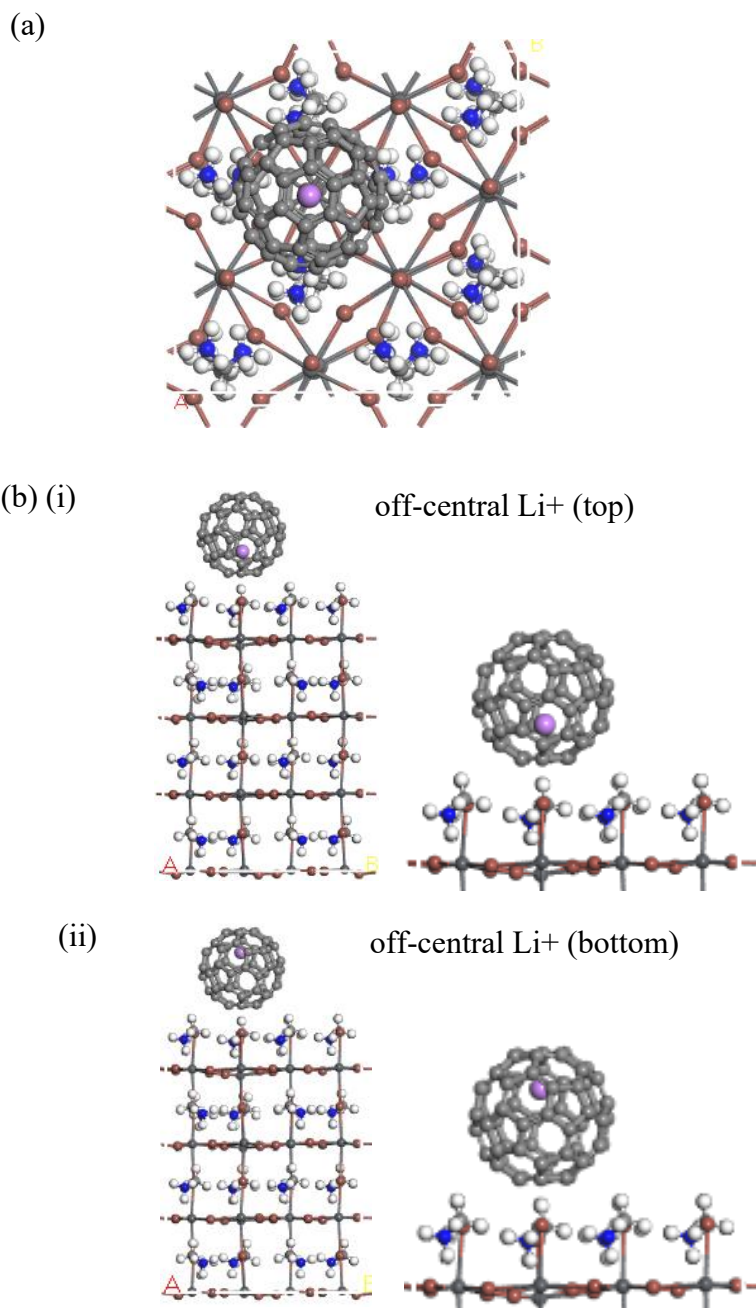

**Figure S3.** Optimized structures of a MAPbI<sub>3</sub>/Li<sup>+</sup>@C<sub>60</sub> heterojunction with tetragonal-phase perovskites: (a) top and (b) side views. The perovskite has a topC orientation with a lithium endohedral fullerene Li<sup>+</sup>@C<sub>60</sub> on the bridge position. (b) Side views represent the Li<sup>+</sup> located at the off-central (i) top and (ii) bottom inside the C<sub>60</sub> cage. H, C, N, I, Pb and Li atoms are represented by the white, light grey, blue, brown, dark grey and purple spheres, respectively.

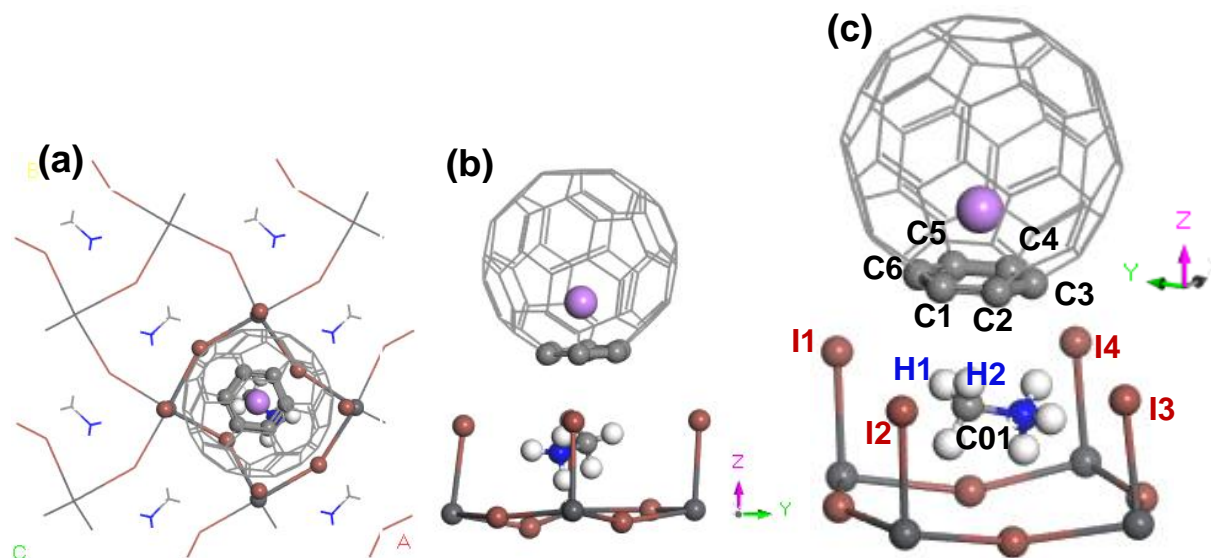

| C...H distance [Å]<br>[vdWs radius < 2.97Å] |       | C...C distance [Å]<br>[vdWs radius < 3.54Å] |       | C...I distance [Å]<br>[vdWs radius < 3.81Å] |       |
|---------------------------------------------|-------|---------------------------------------------|-------|---------------------------------------------|-------|
| C1...H1                                     | 3.499 | C1...C01                                    | 3.530 | C5...I1                                     | 3.934 |
| C2... H1                                    | 3.792 | C2...C01                                    | 3.546 | C6...I1                                     | 3.887 |
| C3... H1                                    | 3.699 | C3...C01                                    | 3.572 | C1...I1                                     | 5.043 |
| C4... H1                                    | 3.301 | C4...C01                                    | 3.580 | C6...I2                                     | 4.792 |
| C5... H1                                    | 2.944 | C5...C01                                    | 3.558 | C1...I2                                     | 3.833 |
| C6... H1                                    | 3.057 | C6...C01                                    | 3.532 | C2...I2                                     | 4.265 |
| C1...H2                                     | 2.667 |                                             |       | C2...I3                                     | 4.213 |
| C2... H2                                    | 2.618 |                                             |       | C3...I3                                     | 3.931 |
| C3... H2                                    | 2.977 |                                             |       | C4...I3                                     | 4.983 |
| C4... H2                                    | 3.321 |                                             |       | C3...I4                                     | 4.518 |
| C5... H2                                    | 3.359 |                                             |       | C4...I4                                     | 3.729 |
| C6... H2                                    | 3.058 |                                             |       | C5...I4                                     | 4.457 |

**Figure S4.** (a) Top view of topC-oriented MAPbI<sub>3</sub> with a neutral lithium endohedral fullerene Li@C<sub>60</sub> on the aboveC position. The Li located at the off-central bottom inside the C<sub>60</sub> cage. (b) Side and (c) perspective views are the selected area (ball and sticks in MAPbI<sub>3</sub>) from top view (a). H, C, N, I, Pb and Li atoms are represented by the white, light grey, blue, brown, dark grey and purple spheres, respectively. Atoms located at the interface between MAPbI<sub>3</sub> and C<sub>60</sub> are labelled, and their atomic distance are summarized in table. Atomic distances that falls within the vdWs atomic radius are represented in red color.

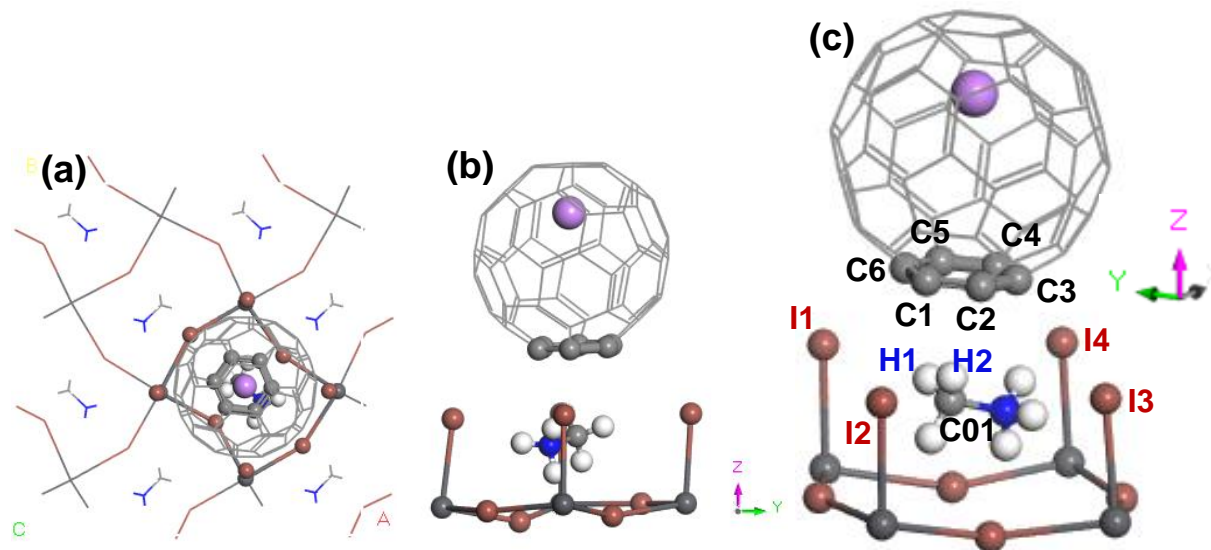

| C...H distance [Å]<br>[vdWs radius < 2.97Å] |       | C...C distance [Å]<br>[vdWs radius < 3.54Å] |       | C...I distance [Å]<br>[vdWs radius < 3.81Å] |       |
|---------------------------------------------|-------|---------------------------------------------|-------|---------------------------------------------|-------|
| C1...H1                                     | 3.527 | C1...C01                                    | 3.547 | C5...I1                                     | 3.950 |
| C2...H1                                     | 3.796 | C2...C01                                    | 3.545 | C6...I1                                     | 3.919 |
| C3...H1                                     | 3.692 | C3...C01                                    | 3.562 | C1...I1                                     | 5.061 |
| C4...H1                                     | 3.304 | C4...C01                                    | 3.581 | C6...I2                                     | 4.829 |
| C5...H1                                     | 2.982 | C5...C01                                    | 3.584 | C1...I2                                     | 3.886 |
| C6...H1                                     | 3.103 | C6...C01                                    | 3.565 | C2...I2                                     | 4.304 |
| C1...H2                                     | 2.672 |                                             |       | C2...I3                                     | 4.264 |
| C2...H2                                     | 2.621 |                                             |       | C3...I3                                     | 3.991 |
| C3...H2                                     | 2.973 |                                             |       | C4...I3                                     | 5.043 |
| C4...H2                                     | 3.320 |                                             |       | C3...I4                                     | 4.541 |
| C5...H2                                     | 3.367 |                                             |       | C4...I4                                     | 3.782 |
| C6...H2                                     | 3.069 |                                             |       | C5...I4                                     | 4.540 |

**Figure S5.** (a) Top view of topC-oriented MAPbI<sub>3</sub> with a neutral lithium endohedral fullerene Li@C<sub>60</sub> on the aboveC position. The Li located at the off-central top inside the C<sub>60</sub> cage. (b) Side and (c) perspective views are the selected area (ball and sticks in MAPbI<sub>3</sub>) from top view (a). H, C, N, I, Pb and Li atoms are represented by the white, light grey, blue, brown, dark grey and purple spheres, respectively. Atoms located at the interface between MAPbI<sub>3</sub> and C<sub>60</sub> are labelled, and their atomic distance are summarized in table. Atomic distances that falls within the vdWs atomic radius are represented in red color.



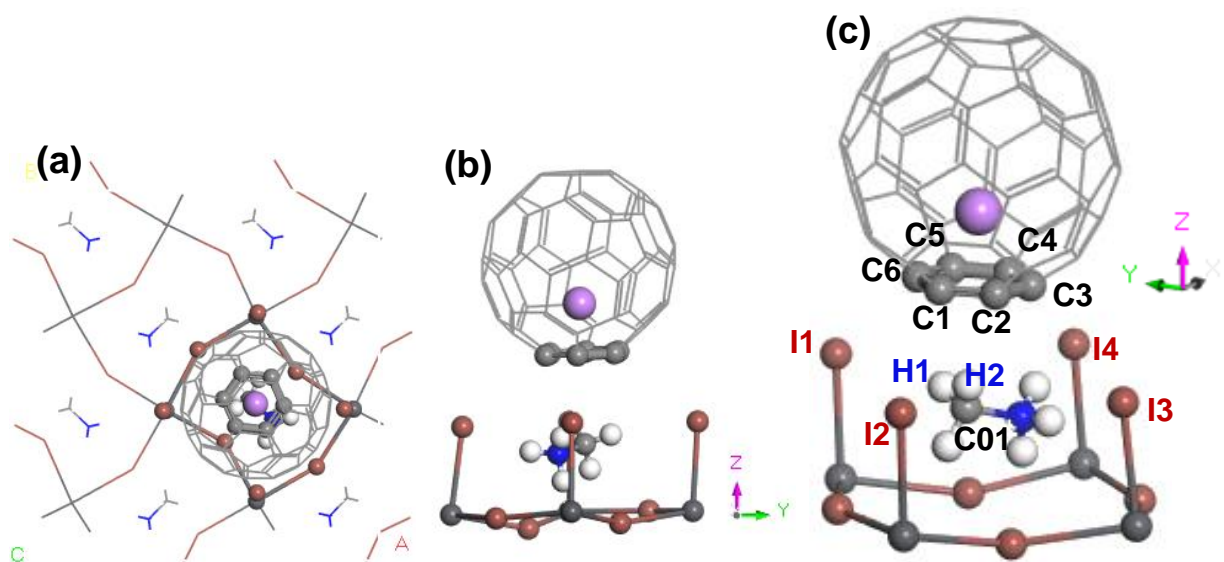

| C...H distance [Å]<br>[vdWs radius < 2.97Å] |       | C...C distance [Å]<br>[vdWs radius < 3.54Å] |       | C...I distance [Å]<br>[vdWs radius < 3.81Å] |       |
|---------------------------------------------|-------|---------------------------------------------|-------|---------------------------------------------|-------|
| C1...H1                                     | 3.529 | C1...C01                                    | 3.538 | C5...I1                                     | 3.943 |
| C2...H1                                     | 3.804 | C2...C01                                    | 3.544 | C6...I1                                     | 3.888 |
| C3...H1                                     | 3.710 | C3...C01                                    | 3.578 | C1...I1                                     | 5.021 |
| C4...H1                                     | 3.326 | C4...C01                                    | 3.604 | C6...I2                                     | 4.851 |
| C5...H1                                     | 2.998 | C5...C01                                    | 3.597 | C1...I2                                     | 3.884 |
| C6...H1                                     | 3.108 | C6...C01                                    | 3.563 | C2...I2                                     | 4.296 |
| C1...H2                                     | 2.660 |                                             |       | C2...I3                                     | 4.226 |
| C2...H2                                     | 2.612 |                                             |       | C3...I3                                     | 3.974 |
| C3...H2                                     | 2.977 |                                             |       | C4...I3                                     | 5.044 |
| C4...H2                                     | 3.330 |                                             |       | C3...I4                                     | 4.501 |
| C5...H2                                     | 3.369 |                                             |       | C4...I4                                     | 3.744 |
| C6...H2                                     | 3.059 |                                             |       | C5...I4                                     | 4.507 |

**Figure S6.** (a) Top view of topC-oriented MAPbI<sub>3</sub> with a lithium endohedral fullerene Li<sup>+</sup>@C<sub>60</sub> on the aboveC position. The Li<sup>+</sup> located at the off-central bottom inside the C<sub>60</sub> cage. (b) Side and (c) perspective views are the selected area (ball and sticks in MAPbI<sub>3</sub>) from top view (a). H, C, N, I, Pb and Li atoms are represented by the white, light grey, blue, brown, dark grey and purple spheres, respectively. Atoms located at the interface between MAPbI<sub>3</sub> and C<sub>60</sub> are labelled, and their atomic distance are summarized in table. Atomic distances that falls within the vdWs atomic radius are represented in red color.



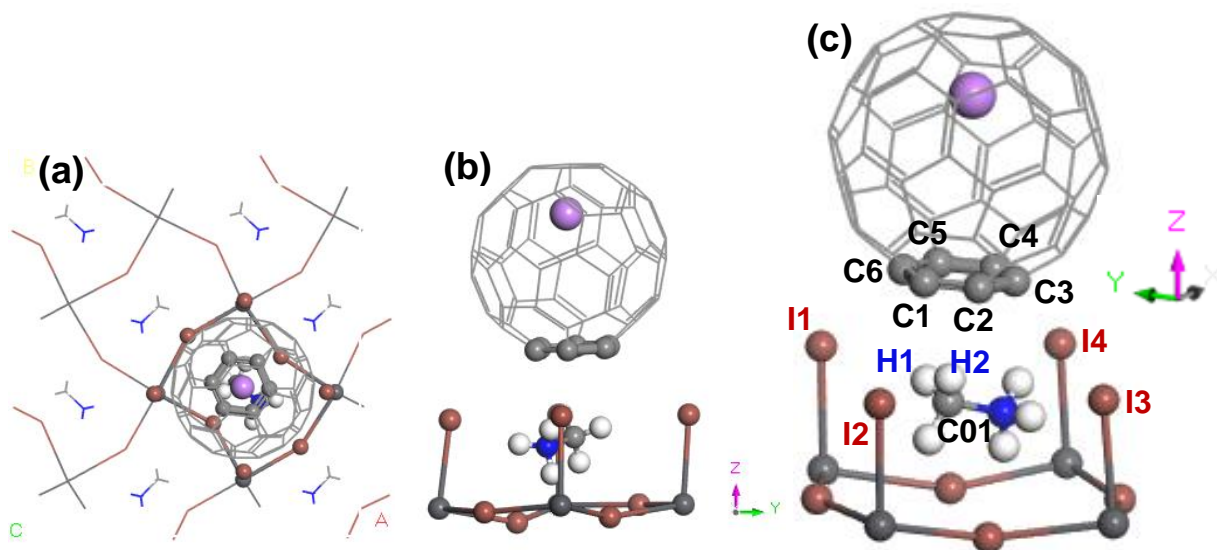

| C...H distance [Å]<br>[vdWs radius < 2.97Å ] |       | C...C distance [Å]<br>[vdWs radius < 3.54Å] |       | C...I distance [Å]<br>[vdWs radius < 3.81Å] |       |
|----------------------------------------------|-------|---------------------------------------------|-------|---------------------------------------------|-------|
| C1...H1                                      | 3.534 | C1...C01                                    | 3.544 | C5...I1                                     | 3.972 |
| C2... H1                                     | 3.806 | C2...C01                                    | 3.549 | C6...I1                                     | 3.918 |
| C3... H1                                     | 3.714 | C3...C01                                    | 3.583 | C1...I1                                     | 5.044 |
| C4... H1                                     | 3.335 | C4...C01                                    | 3.610 | C6...I2                                     | 4.877 |
| C5... H1                                     | 3.009 | C5...C01                                    | 3.604 | C1...I2                                     | 3.918 |
| C6... H1                                     | 3.117 | C6...C01                                    | 3.570 | C2...I2                                     | 4.324 |
| C1...H2                                      | 2.665 |                                             |       | C2...I3                                     | 4.259 |
| C2... H2                                     | 2.619 |                                             |       | C3...I3                                     | 4.009 |
| C3... H2                                     | 2.983 |                                             |       | C4...I3                                     | 5.067 |
| C4... H2                                     | 3.333 |                                             |       | C3...I4                                     | 4.537 |
| C5... H2                                     | 3.370 |                                             |       | C4...I4                                     | 3.787 |
| C6... H2                                     | 3.062 |                                             |       | C5...I4                                     | 4.543 |

**Figure S7.** (a) Top view of topC-oriented MAPbI<sub>3</sub> with a lithium endohedral fullerene Li<sup>+</sup>@C<sub>60</sub> on the aboveC position. The Li<sup>+</sup> located at the off-central top inside the C<sub>60</sub> cage. (b) Side and (c) perspective views are the selected area (ball and sticks in MAPbI<sub>3</sub>) from top view (a). H, C, N, I, Pb and Li atoms are represented by the white, light grey, blue, brown, dark grey and purple spheres, respectively. Atoms located at the interface between MAPbI<sub>3</sub> and C<sub>60</sub> are labelled, and their atomic distance are summarized in table. Atomic distances that falls within the vdWs atomic radius are represented in red color.

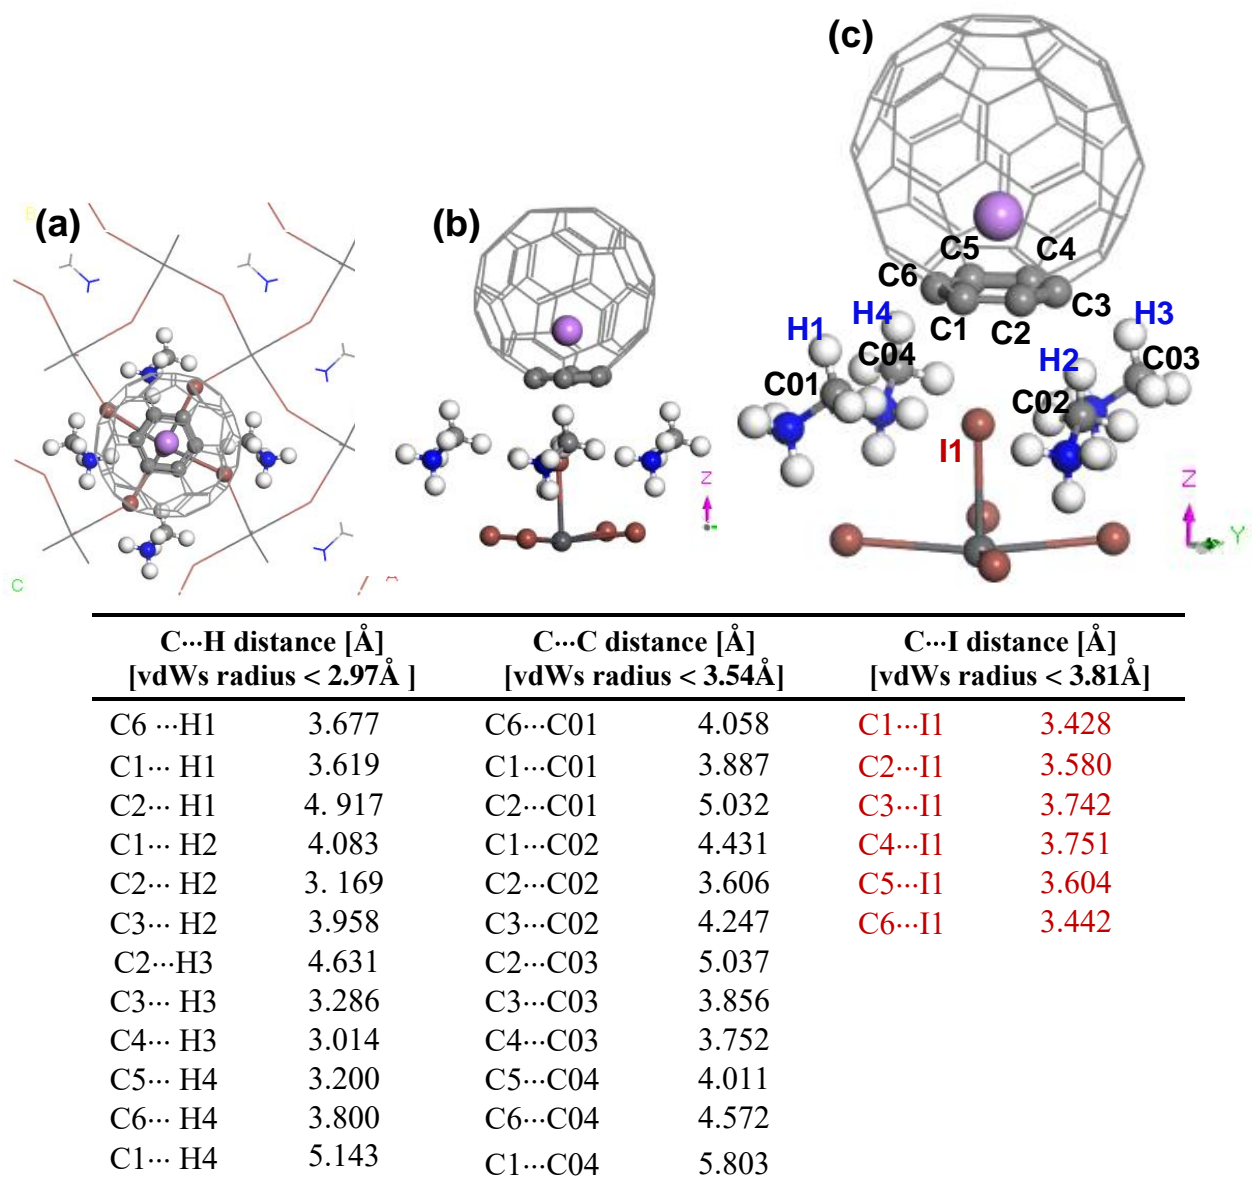

**Figure S8.** (a) Top view of topC-oriented MAPbI<sub>3</sub> with a lithium endohedral fullerene Li<sup>+</sup>@C<sub>60</sub> on the aboveI position. The Li<sup>+</sup> located at the off-central bottom inside the C<sub>60</sub> cage. (b) Side and (c) perspective views are the selected area (ball and sticks in MAPbI<sub>3</sub>) from top view (a). H, C, N, I, Pb and Li atoms are represented by the white, light grey, blue, brown, dark grey and purple spheres, respectively. Atoms located at the interface between MAPbI<sub>3</sub> and C<sub>60</sub> are labelled, and their atomic distance are summarized in table. Atomic distances that falls within the vdWs atomic radius are represented in red color.

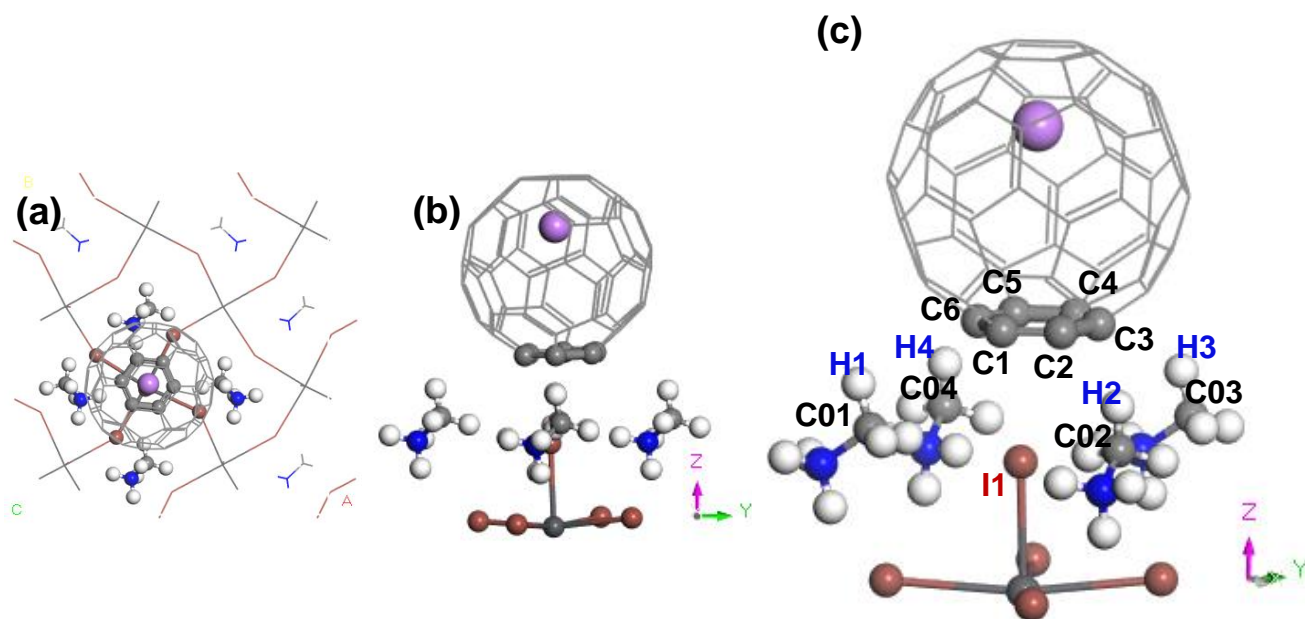

| C...H distance [Å]<br>[vdWs radius < 2.97Å ] |       | C...C distance [Å]<br>[vdWs radius < 3.54Å] |       | C...I distance [Å]<br>[vdWs radius < 3.81Å] |       |
|----------------------------------------------|-------|---------------------------------------------|-------|---------------------------------------------|-------|
| C6 ...H1                                     | 3/686 | C6...C01                                    | 4.084 | C1...I1                                     | 3.411 |
| C1... H1                                     | 3.624 | C1...C01                                    | 3.908 | C2...I1                                     | 3.566 |
| C2... H1                                     | 4.911 | C2...C01                                    | 5.045 | C3...I1                                     | 3.742 |
| C1... H2                                     | 4.080 | C1...C02                                    | 4.429 | C4...I1                                     | 3.762 |
| C2... H2                                     | 3.173 | C2...C02                                    | 3.617 | C5...I1                                     | 3.613 |
| C3... H2                                     | 3.956 | C3...C02                                    | 4.266 | C6...I1                                     | 3.438 |
| C2...H3                                      | 4.625 | C2...C03                                    | 5.002 |                                             |       |
| C3... H3                                     | 3.255 | C3...C03                                    | 3.831 |                                             |       |
| C4... H3                                     | 2.998 | C4...C03                                    | 3.736 |                                             |       |
| C5... H4                                     | 3.193 | C5...C04                                    | 3.999 |                                             |       |
| C6... H4                                     | 3.782 | C6...C04                                    | 4.548 |                                             |       |
| C1... H4                                     | 5.120 | C1...C04                                    | 5.733 |                                             |       |

**Figure S9.** (a) Top view of topC-oriented MAPbI<sub>3</sub> with a lithium endohedral fullerene Li<sup>+</sup>@C<sub>60</sub> on the aboveI position. The Li<sup>+</sup> located at the off-central bottom inside the C<sub>60</sub> cage. (b) Side and (c) perspective views are the selected area (ball and sticks in MAPbI<sub>3</sub>) from top view (a). H, C, N, I, Pb and Li atoms are represented by the white, light grey, blue, brown, dark grey and purple spheres, respectively. Atoms located at the interface between MAPbI<sub>3</sub> and C<sub>60</sub> are labelled, and their atomic distance are summarized in table. Atomic distances that falls within the vdWs atomic radius are represented in red color.

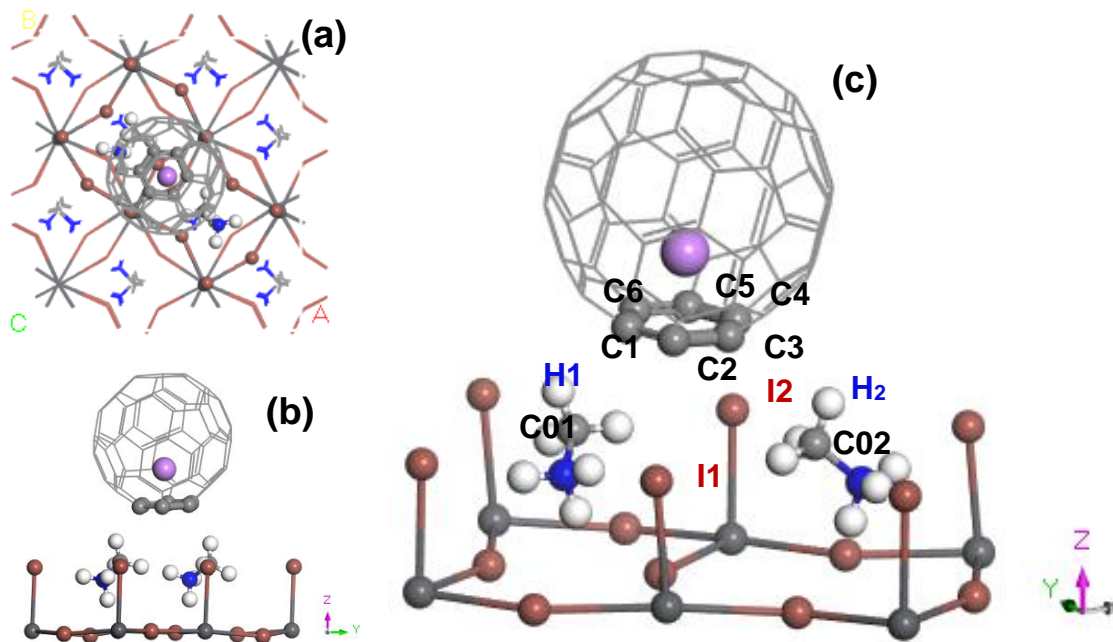

| C...H distance [Å]<br>[vdWs radius < 2.97Å] |              | C...C distance [Å]<br>[vdWs radius < 3.54Å] |              | C...I distance [Å]<br>[vdWs radius < 3.81Å] |              |
|---------------------------------------------|--------------|---------------------------------------------|--------------|---------------------------------------------|--------------|
| C1...H1                                     | 3.055        | C1...C01                                    | 3.732        | C1...I1                                     | 4.074        |
| C2... H1                                    | 4.162        | C2...C01                                    | 4.602        | <b>C2...I1</b>                              | <b>3.519</b> |
| C3... H1                                    | 4.902        | C3...C01                                    | 5.519        | C3...I1                                     | 4.125        |
| C4... H1                                    | 4.747        | C4...C01                                    | 4.959        | C4...I1                                     | 5.064        |
| C5... H1                                    | 3.780        | C5...C01                                    | 4.135        | C5...I1                                     | 5.476        |
| <b>C6... H1</b>                             | <b>2.791</b> | <b>C6...C01</b>                             | <b>3.443</b> | C6...I1                                     | 5.062        |
| C1...H2                                     | 5.243        | C1...C02                                    | 5.399        | C1...I2                                     | 5.496        |
| C2... H2                                    | 4.203        | C2...C02                                    | 4.473        | C2...I2                                     | 5.674        |
| <b>C3... H2</b>                             | <b>2.974</b> | <b>C3...C02</b>                             | <b>3.451</b> | C3...I2                                     | 4.978        |
| C4... H2                                    | 3.177        | C4...C02                                    | 3.629        | C4...I2                                     | 3.969        |
| C5... H2                                    | 4.499        | C5...C02                                    | 4.765        | <b>C5...I2</b>                              | <b>3.703</b> |
| C6... H2                                    | 5.365        | C6...C02                                    | 5.521        | C6...I2                                     | 4.564        |

**Figure S10.** (a) Top view of topC-oriented MAPbI<sub>3</sub> with a lithium endohedral fullerene Li<sup>+</sup>@C<sub>60</sub> on the bridge position. The Li<sup>+</sup> located at the off-central bottom inside the C<sub>60</sub> cage. (b) Side and (c) perspective views are the selected area (ball and sticks in MAPbI<sub>3</sub>) from top view (a). H, C, N, I, Pb and Li atoms are represented by the white, light grey, blue, brown, dark grey and purple spheres, respectively. Atoms located at the interface between MAPbI<sub>3</sub> and C<sub>60</sub> are labelled, and their atomic distance are summarized in table. Atomic distances that falls within the vdWs atomic radius are represented in red color.

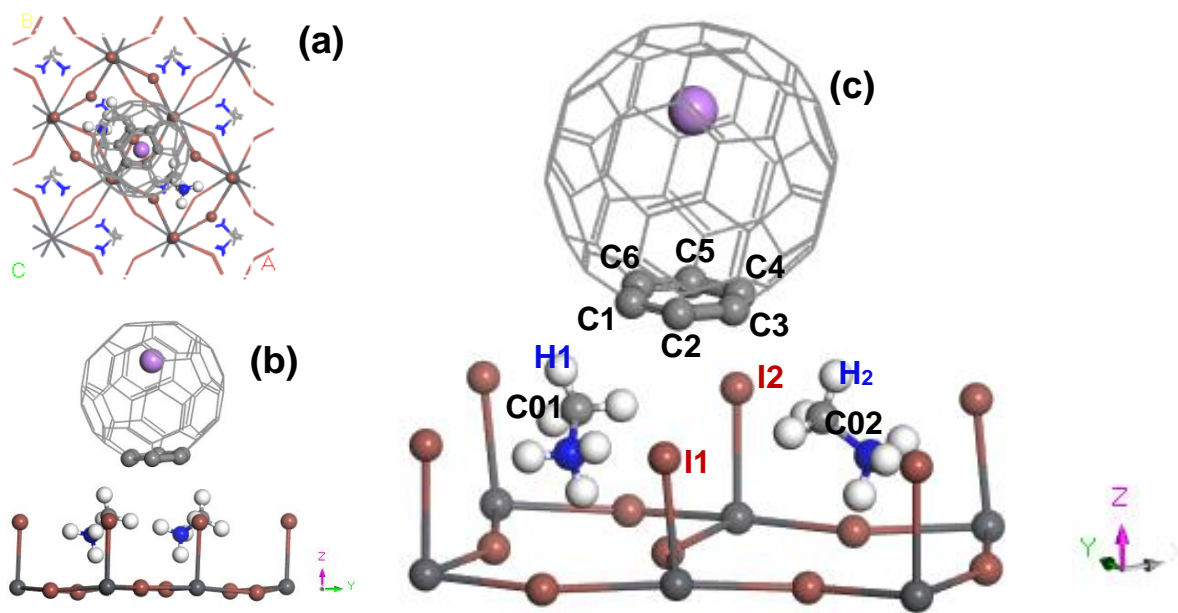

| C...H distance [Å]<br>[vdWs radius < 2.97Å] |              | C...C distance [Å]<br>[vdWs radius < 3.54Å] |              | C...I distance [Å]<br>[vdWs radius < 3.81Å] |              |
|---------------------------------------------|--------------|---------------------------------------------|--------------|---------------------------------------------|--------------|
| C1...H1                                     | 3.065        | C1...C01                                    | 3.744        | C1...I1                                     | 4.122        |
| C2... H1                                    | 4.161        | C2...C01                                    | 4.605        | <b>C2...I1</b>                              | <b>3.568</b> |
| C3... H1                                    | 4.895        | C3...C01                                    | 5.156        | C3...I1                                     | 4.159        |
| C4... H1                                    | 4.740        | C4...C01                                    | 4.958        | C4...I1                                     | 5.092        |
| C5... H1                                    | 3.778        | C5...C01                                    | 4.140        | C5...I1                                     | 5.508        |
| <b>C6... H1</b>                             | <b>2.801</b> | <b>C6...C01</b>                             | <b>3.457</b> | C6...I1                                     | 5.092        |
| C1...H2                                     | 5.247        | C1...C02                                    | 5.406        | C1...I2                                     | 5.518        |
| C2... H2                                    | 4.215        | C2...C02                                    | 4.485        | C2...I2                                     | 5.692        |
| <b>C3... H2</b>                             | <b>2.990</b> | <b>C3...C02</b>                             | <b>3.465</b> | C3...I2                                     | 5.006        |
| C4... H2                                    | 3.191        | C4...C02                                    | 3.643        | C4...I2                                     | 4.001        |
| C5... H2                                    | 4.507        | C5...C02                                    | 4.766        | <b>C5...I2</b>                              | <b>3.741</b> |
| C6... H2                                    | 5.369        | C6...C02                                    | 5.526        | C6...I2                                     | 4.593        |

**Figure S11.** (a) Top view of topC-oriented MAPbI<sub>3</sub> with a lithium endohedral fullerene Li<sup>+</sup>@C<sub>60</sub> on the bridge position. The Li<sup>+</sup> located at the off-central top inside the C<sub>60</sub> cage. (b) Side and (c) perspective views are the selected area (ball and sticks in MAPbI<sub>3</sub>) from top view (a). H, C, N, I, Pb and Li atoms are represented by the white, light grey, blue, brown, dark grey and purple spheres, respectively. Atoms located at the interface between MAPbI<sub>3</sub> and C<sub>60</sub> are labelled, and their atomic distance are summarized in table. Atomic distances that falls within the vdWs atomic radius are represented in red color.

**Table S1.** Highest occupied molecular orbital (HOMO), lowest unoccupied molecular orbital (LUMO), band gap and the total energies of the MAPbI<sub>3</sub>/Li<sup>+</sup>@C<sub>60</sub> heterojunctions relative to the aboveC position with a Li<sup>+</sup> (Li) at the off-central bottom inside the C<sub>60</sub> cage. The calculated values in bracket are for a MAPbI<sub>3</sub> with a neutral lithium endohedral fullerene Li@C<sub>60</sub> on the topC position.

| <b>Position of Li<sup>+</sup> (Li) in C<sub>60</sub> cage</b> | <b>Surface geometry</b> | <b>HOMO [eV]</b>   | <b>LUMO [eV]</b>   | <b>band gap [eV]</b> | <b>total relative energy [eV]</b> |
|---------------------------------------------------------------|-------------------------|--------------------|--------------------|----------------------|-----------------------------------|
| off-central top                                               | aboveC                  | -6.309<br>(-5.190) | -5.706<br>(-5.065) | 0.603<br>(0.125)     | 0.031<br>(0.008)                  |
|                                                               | aboveI                  | -6.282             | -5.719             | 0.563                | 0.267                             |
|                                                               | bridge                  | -6.260             | -5.672             | 0.589                | 0.173                             |
| off-central bottom                                            | aboveC                  | -6.369<br>(-5.127) | -5.743<br>(-5.002) | 0.626<br>(0.125)     | 0<br>(0)                          |
|                                                               | aboveI                  | -6.338             | -5.763             | 0.575                | 0.250                             |
|                                                               | bridge                  | -6.322             | -5.708             | 0.614                | 0.163                             |

**Table S2.** Hirshfeld atomic charges of fragments [CH<sub>3</sub>], [1], [Li], [Li<sup>+</sup>] and [C] at the MAPbI<sub>3</sub>/Li<sup>+</sup>@C<sub>60</sub> interface with the Li<sup>+</sup>@C<sub>60</sub> on the aboveC, aboveI and bridge positions. The Li<sup>+</sup> located at the off-central top inside the C<sub>60</sub> cage. Values in bracket denote the atomic distance for the Li<sup>+</sup> located at the off-central bottom inside the C<sub>60</sub> cage. Fragments are labelled in according to Fig. S4-S11.

| fragments               | MAPbI <sub>3</sub><br>/Li@C <sub>60</sub> |                    | MAPbI <sub>3</sub> /Li <sup>+</sup> @C <sub>60</sub> |                    |
|-------------------------|-------------------------------------------|--------------------|------------------------------------------------------|--------------------|
|                         | aboveC [e]<br>(neutral Li)                | aboveC [e]         | aboveI [e]                                           | bridge [e]         |
| [C01H <sub>3</sub> ]    | -0.006<br>(-0.007)                        | -0.004<br>(-0.007) | 0.057<br>(0.058)                                     | 0.058<br>(0.057)   |
| [C02H <sub>3</sub> ]    |                                           |                    | 0.048<br>(0.046)                                     | 0.062<br>(0.060)   |
| [C03H <sub>3</sub> ]    |                                           |                    | 0.067<br>(0.066)                                     |                    |
| [C04H <sub>3</sub> ]    |                                           |                    | 0.071<br>(0.069)                                     |                    |
| [I1]                    | -0.212<br>(-0.211)                        | -0.205<br>(-0.211) | -0.169<br>(-0.177)                                   | -0.213<br>(-0.218) |
| [I2]                    | -0.222<br>(-0.221)                        | -0.215<br>(-0.220) |                                                      | -0.213<br>(-0.219) |
| [I3]                    | -0.222<br>(-0.221)                        | -0.216<br>(-0.220) |                                                      |                    |
| [I4]                    | -0.216<br>(-0.212)                        | -0.209<br>(-0.210) |                                                      |                    |
| [Li <sup>+</sup> ]/[Li] | 0.361<br>(0.359)                          | 0.360<br>(0.362)   | 0.360<br>(0.363)                                     | 0.358<br>(0.362)   |
| [C1]                    | 0.000<br>(-0.010)                         | -0.001<br>(-0.009) | -0.003<br>(-0.010)                                   | -0.007<br>(-0.015) |
| [C2]                    | -0.003<br>(-0.012)                        | -0.003<br>(-0.011) | -0.002<br>(-0.010)                                   | -0.005<br>(-0.013) |
| [C3]                    | -0.06<br>(-0.014)                         | -0.007<br>(-0.016) | -0.005<br>(-0.014)                                   | 0.000<br>(-0.007)  |
| [C4]                    | -0.07<br>(-0.016)                         | -0.009<br>(-0.018) | -0.010<br>(-0.020)                                   | -0.001<br>(-0.009) |
| [C5]                    | -0.012<br>(-0.027)                        | -0.007<br>(-0.015) | -0.010<br>(-0.019)                                   | -0.004<br>(-0.012) |
| [C6]                    | -0.007<br>(-0.023)                        | -0.002<br>(-0.009) | -0.008<br>(-0.008)                                   | -0.001<br>(-0.009) |
